# Supplementary material for: Assembly and comparative analysis of complete mitochondrial genome sequence of an economic plant Salix suchowensis
Source: PubMed Central journal article supplement (PMC5374973; doi:10.7717/peerj.3148), 2017-03-29

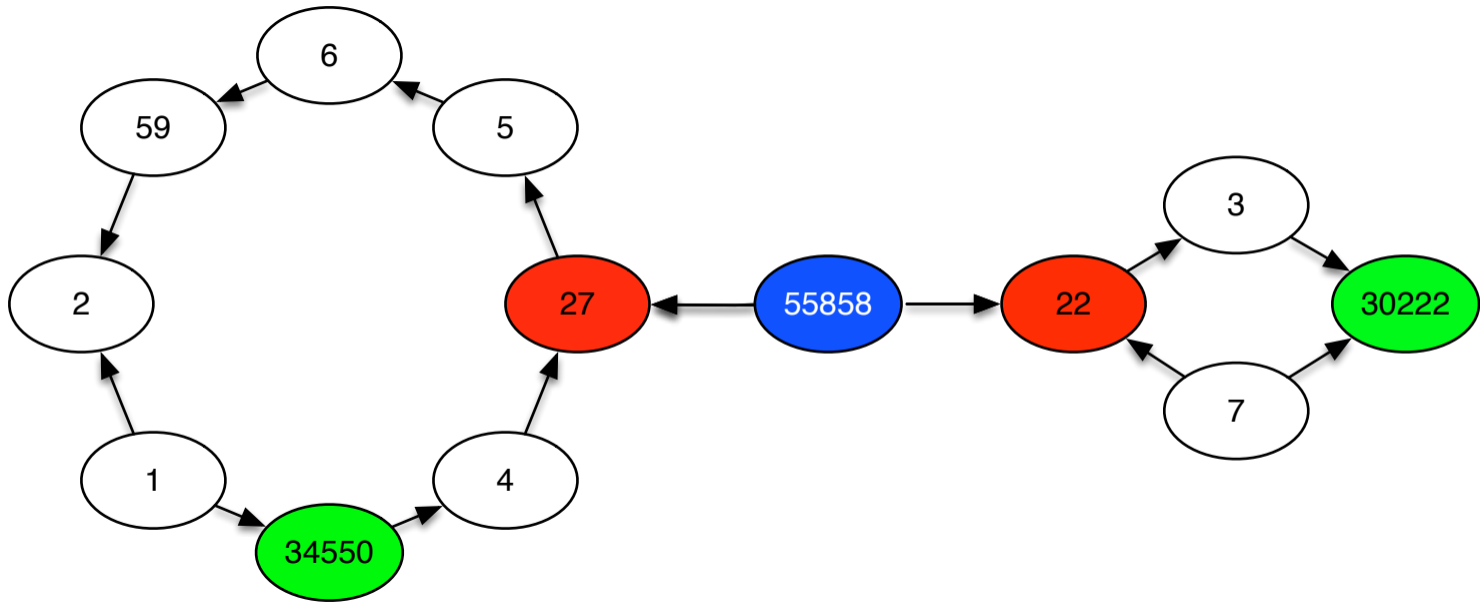

Supplement: peerj-05-3148-s001.pdf [file peerj-05-3148-s001.pdf]
