# Supplementary material for: Assembly and comparative analysis of complete mitochondrial genome sequence of an economic plant Salix suchowensis
Source: PubMed Central journal article supplement (PMC5374973; doi:10.7717/peerj.3148), 2017-03-29
Supplement: peerj-05-3148-s002.pdf [file peerj-05-3148-s002.pdf]

# Salix Suchowensis mitochondrion: 10 kbp from Salix\_su\_mt:1..10,000

Browser [Select Tracks](#) [Snapshots](#) [Custom Tracks](#) [Preferences](#)

Search  
Landmark or Region:

Salix\_su\_mt:1..10,000

Examples: [Salix\\_su\\_mt](#), [Salix\\_su\\_mt:80000..120000](#), [atp1](#), [nad4L](#).

Data Source  
Salix Suchowensis mitochondrion

Annotate Restriction Sites

Scroll/Zoom:       Flip

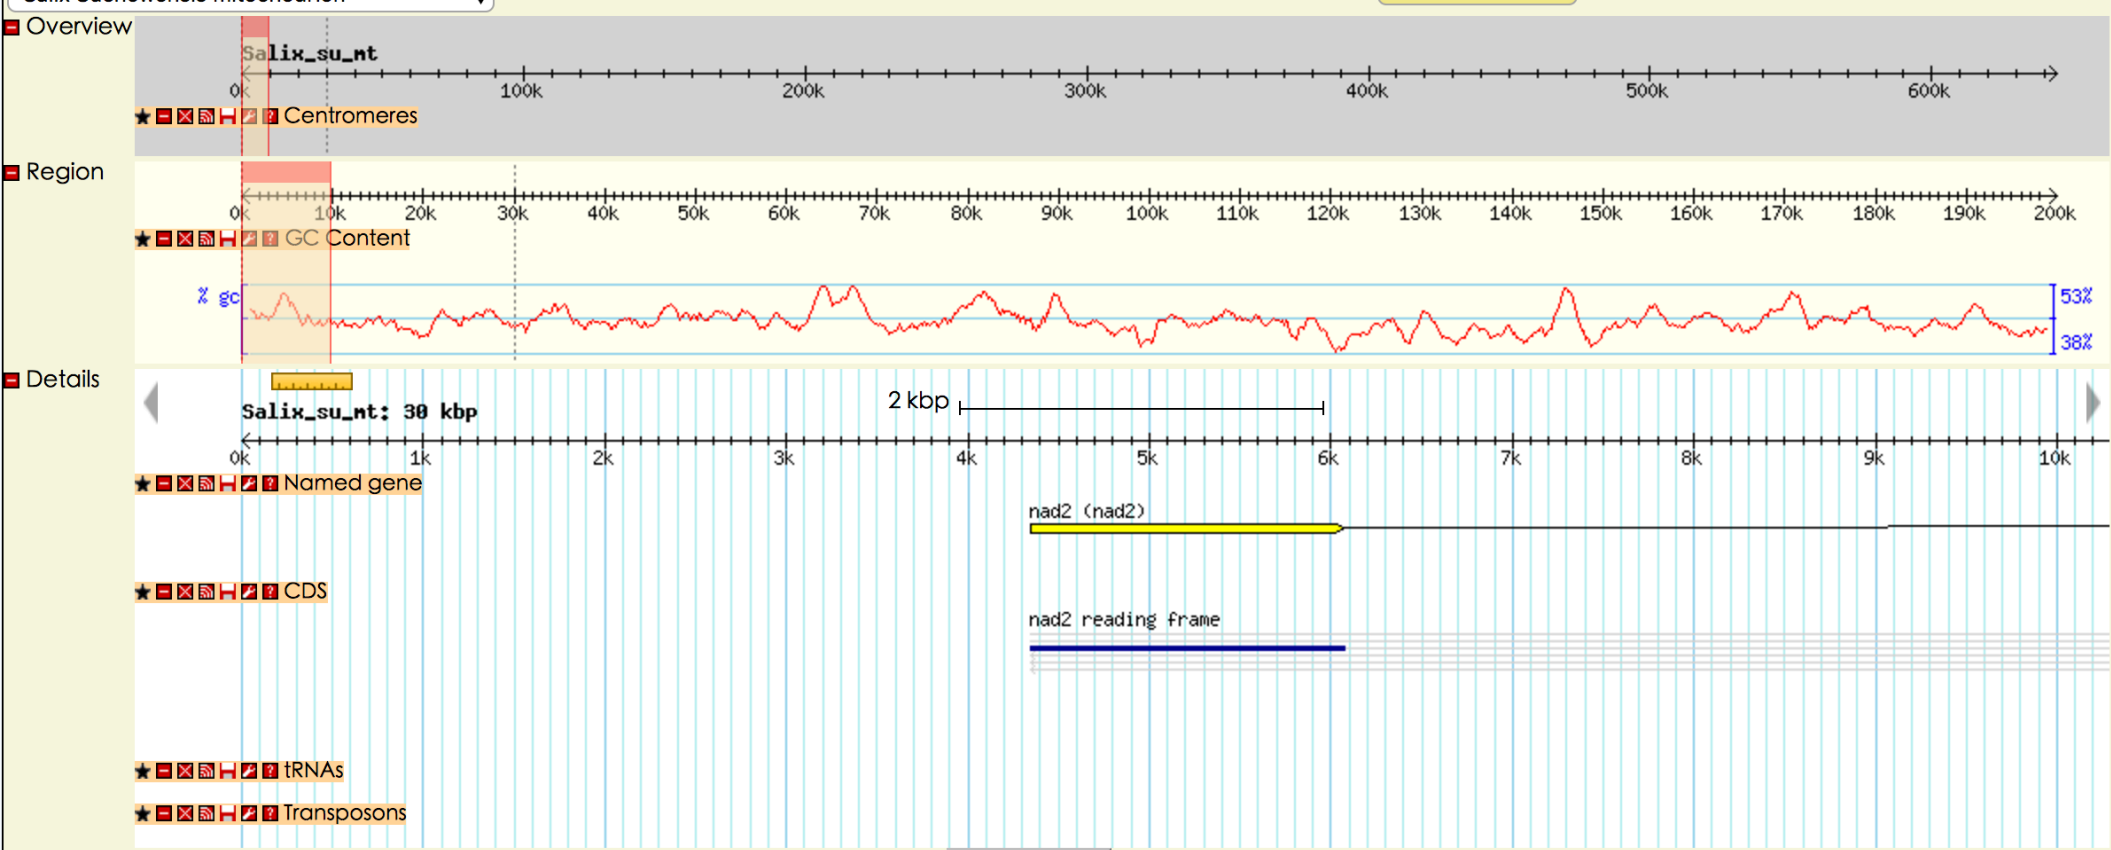

[Clear highlighting](#)
